# Supplementary material for: Endoscopic transcecal appendectomy: a new endotherapy for appendiceal orifice lesions
Source: PubMed Central journal article supplement — Endoscopy. 2021 Dec 14;54(6):585–90. doi: 10.1055/a-1675-2625 (PMC9132730; doi:10.1055/a-1675-2625), 2021-12-14
Supplement: 20925supmat_10-1055-a-1675-2625.pdf [file 20925supmat_10-1055-a-1675-2625.pdf]

## Supplementary material

**Endoscopic transcecal appendectomy: a new endotherapy for appendiceal orifice lesions**

Guo L et al.

**Fig. 1s** Endoscopic images of the 12 patients with lesions involving the appendiceal orifice (the image of case 1 was published previously [1], and thus was not shown here).

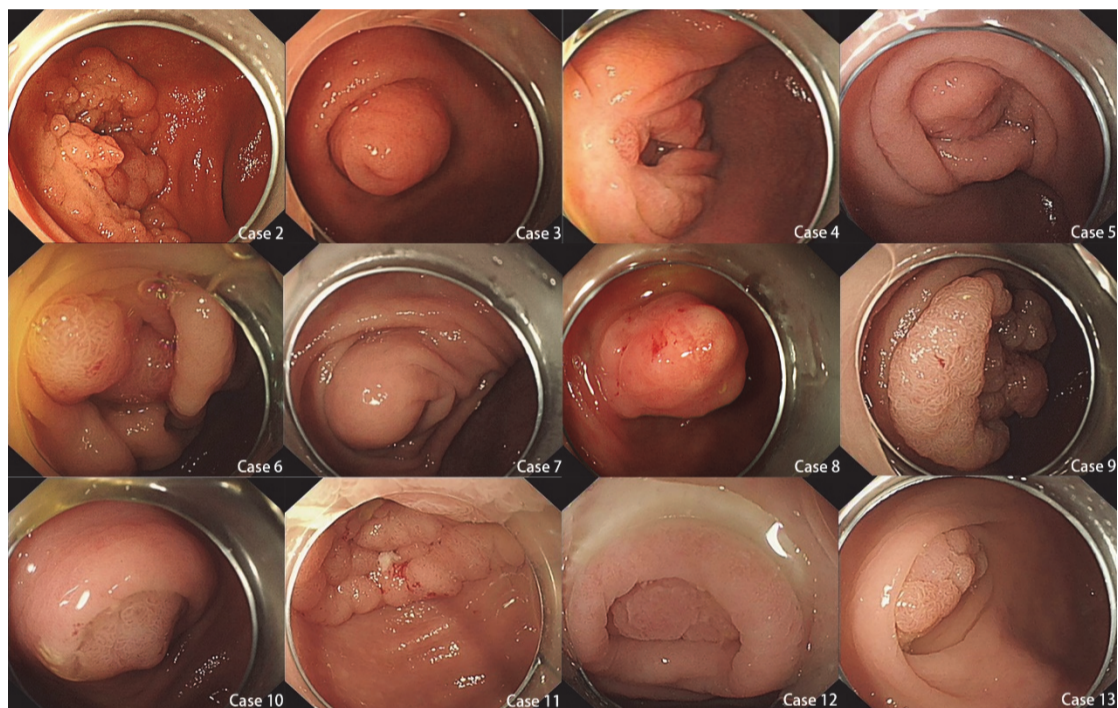**Reference**

1. Yuan XL, Cheung O, Du J et al. Endoscopic transcecal appendectomy. *Endoscopy* 2019; 51: 994–995
